# Supplementary material for: Portrayals of Schizophrenia by Entertainment Media: A Content Analysis of Contemporary Movies
Source: Atypon-hosted journal article supplement (doi:10.1176/appi.ps.201100371), 2012-05-01
Supplement: ps.201100371_ds.pdf [file ps.201100371_ds.pdf]

| Movie Name                  | Date | Protagonist       | Violence: Others <sup>1</sup> | Violence: Self <sup>2</sup> | Treatment <sup>3</sup> |
|-----------------------------|------|-------------------|-------------------------------|-----------------------------|------------------------|
| Alphabet killer             | 2008 | Megan Paige       | yes                           | yes                         | none                   |
| Angel Baby*                 | 1995 | Harry             | no                            | no                          | med, group             |
| Angel Baby*                 | 1995 | Kate              | yes                           | no                          | med, group             |
| Butcher Boy                 | 1997 | Francie Brady     | yes                           | yes                         | ECT                    |
| Caveman's Valentine         | 2001 | Romulus           | no                            | no                          | none                   |
| A Beautiful Mind            | 2002 | John Nash         | yes                           | yes                         | med, insulin           |
| Benny & Joon                | 1993 | Joon              | no                            | no                          | med                    |
| Bug                         | 2006 | Peter Winter      | yes                           | yes                         | none                   |
| Canvas*                     | 2006 | Mary Marino       | no                            | no                          | med, group             |
| Clean Shaven*               | 1993 | Peter Winter      | no                            | yes                         | none                   |
| Cutting for Stone           | 2008 | Phillip           | no                            | yes                         | med                    |
| Disorder                    | 2006 | David Randall     | yes                           | no                          | med                    |
| Disturbance                 | 1990 | Clay Moyer        | yes                           | yes                         | med                    |
| Donnie Darko                | 2001 | Donnie Darko      | yes                           | yes                         | med, hypno             |
| Fisher King                 | 1991 | Perry             | no                            | no                          | none                   |
| Forever Lulu                | 2007 | Lulu              | no                            | yes                         | med                    |
| In the Light of the Moon    | 2000 | Ed Gein           | yes                           | no                          | none                   |
| In the Mouth of Madness     | 1994 | John Trent        | yes                           | no                          | none                   |
| Julien Donkey-Boy           | 1999 | Julien            | yes                           | yes                         | med                    |
| Keane                       | 2004 | William Keane     | yes                           | no                          | none                   |
| K-PAX                       | 2001 | Prot              | no                            | no                          | group, hypno           |
| Love Object                 | 2004 | Kenneth Winslow   | yes                           | no                          | none                   |
| Lunatics: A Love Story      | 1991 | Hank Stone        | yes                           | yes                         | none                   |
| Mad Dogs                    | 2002 | Rabbie Burns      | no                            | no                          | med                    |
| May                         | 2002 | May Dove Canady   | yes                           | yes                         | none                   |
| Me, Myself, & Irene         | 2000 | Charlie / Hank    | yes                           | no                          | med                    |
| Murder Inside Me            | 2009 | Kile              | no                            | yes                         | med                    |
| My Sweet Killer             | 1999 | Charlie Cavanaugh | yes                           | yes                         | med                    |
| Neverwas                    | 2005 | Gabriel Finch     | no                            | no                          | group                  |
| Oil on Water*               | 2007 | Max               | no                            | yes                         | med                    |
| On My Own                   | 1993 | Simon's mother    | no                            | yes                         | med                    |
| Pi                          | 1998 | Maximilian Cohen  | yes                           | yes                         | none                   |
| Proof                       | 2005 | Robert            | no                            | no                          | none                   |
| Psychosomatic               | 2008 | Ruth Hayes        | yes                           | yes                         | med                    |
| Revolution #9*              | 2001 | James Jackson     | yes                           | yes                         | med                    |
| Shutter Island              | 2010 | Teddy Daniels     | yes                           | no                          | med                    |
| Soloist*                    | 2009 | Nathaniel Ayers   | yes                           | no                          | none                   |
| Some Voices*                | 2000 | Ray               | yes                           | no                          | med                    |
| Spider                      | 2002 | Spider            | yes                           | yes                         | none                   |
| Stateside                   | 2004 | Dori Lawrence     | no                            | yes                         | med, group             |
| The Saint of Ft. Washington | 1993 | Matthew           | no                            | no                          | none                   |
| The Living & the Dead       | 2006 | James Brocklebank | yes                           | yes                         | med                    |

\*realistic symptom portrayal

1 includes homicide

2 includes suicide

3 includes references to treatment

\*realistic symptom portrayal

1 includes homicide

2 includes suicide

3 includes references to treatment
